# Supplementary material
Source: Springer Nature journal article supplement (https://www.springermedizin.de/resource/supplementary/12890_2010_252_MOESM4_ESM.pdf/9504796)

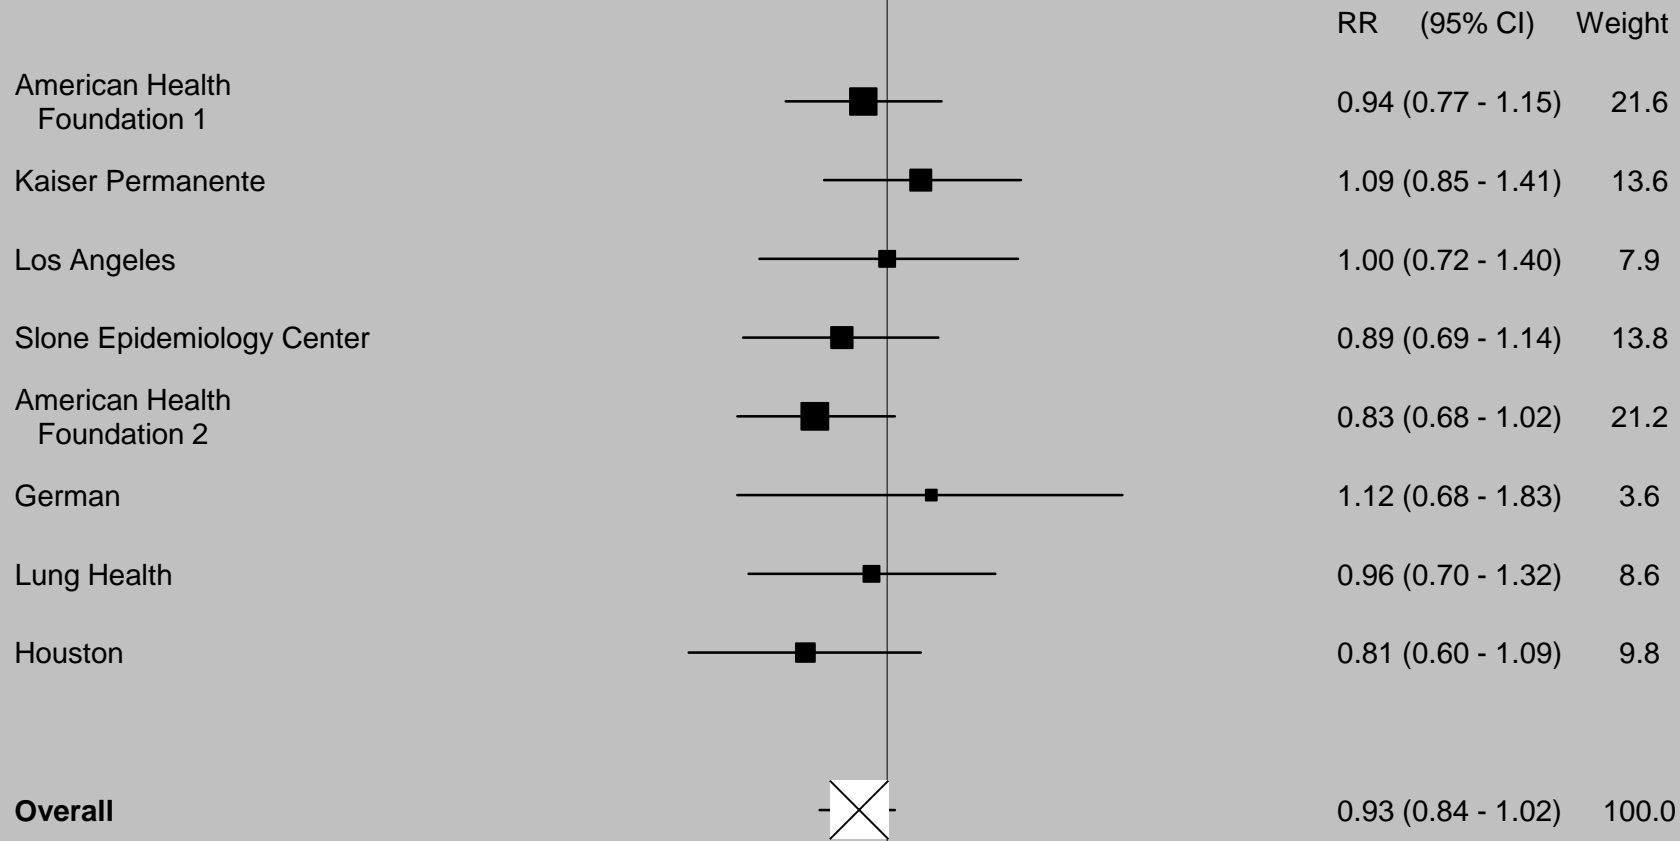

0.10      Logarithmic scale for RR (95% CI) values      1.00      10.00

Supplement: MOESM4 [file 9504796]
